# Supplementary material for: Comment on ‘Self-assembled multiporphyrin arrays mediated by self-complementary quadrupole hydrogen bond motifs’
Source: Royal Society of Chemistry journal article supplement (doi:10.1039/b101678b), 2001-01-01
Supplement: b101678b.doc [file b101678b.doc]

**Supplementary** **Material**

**Comment on "Self-assembled multiporphyrin arrays mediated by self-complementary quadrupole hydrogen bond motifs"**

Gianfranco Ercolani*

*Dipartimento di Scienze e Tecnologie Chimiche, Università di Roma Tor Vergata, Via della Ricerca Scientifica, 00133 Roma, Italy. E-mail: ercolani@uniroma2.it*

**Oligomerisation of AA.** Let *K* be the equilibrium constant for the dimerisation of a monofunctional reactant RA:

(1S)

Since the symmetry number of the dimer is 2 (for symmetry numbers see, for example: E. L. Eliel and S. H. Wilen, *Stereochemistry of Organic Compounds*, Wiley, New York, 1994, pp. 96 and 601), it is useful to introduce the equilibrium constant corrected for the entropy of symmetry, *K* ' ( = 2 *K*). Now consider the following equilibrium:

(2S)

Since the symmetry number of each oligomer appearing in Equation (2S) is 2, the corresponding equilibrium constant is equal to 2 *K* ' (= 4 *K*), thus for *i* = 2

[L2] = 4*K* [L1]2 (3S)

for *i* = 3

[L3] = 4*K* [L1][L2] = (4*K*)2 [L1]3 (4S)

In general

[L*i*] = (4*K*)*i* - 1 [L1]*i* (5S)

For the sake of generality let us indicate the symmetry factor 4 as . If we define the variable *x* =  *K* [L1], Equation (5S) becomes Equation (1). Now let us demonstrate that *x* is the fraction of reacted end groups, that is

(6S)

Substituting Equation (1) into Equation (6S), Equation (7S) is obtained

(7S)

The two series appearing in Equation (7S) are convergent only when 0  *x* < 1. In this interval of *x*, Equations (8S) and (9S) hold

(8S)

(9S)

This can be easily verified noting that the left-hand sides of Equations (8S) and (9S) are the Maclaurin series expansion of the corresponding right-hand sides.

Substituting Equations (8S) and (9S) into Equation (7S), the thesis follows.

Now let us consider the mass balance equation

(10S)

where [L1]0 is the initial monomer concentration.

Substituting Equation (1) into Equation (10S), Equation (11S) is obtained

(11S)

Substituting Equation (9S) into Equation (11S), Equation (2) is obtained. Equation (2) is a second order equation that can be easily solved for *x*

(12S)

The weight fraction of the oligomer L*i* is given by the following equation

*wi* = *i* [L*i*]/[L1]0 (13S)

Substitution of Equation (1) into Equation (13S) yields

(14S)

Substitution of Equation (12S) into Equation (14S) yields Equation (15S).

(15S)

Plots of Equation (15S) for the first five oligomers are reported in Figure 1.

Equation (15S) shows a maximum in correspondence of

(16S)

By substitution of Equation (16S) into Equation (15S) the maximum weight fraction that can be obtained for a given oligomer L*i* is

(17S)

**Equilibration of AA in the presence of RA.** As illustrated in Scheme 1S, a mixture of a monofunctional reactant RA (A) and of a bifunctional reactant AA (L1) will generate in solution the dimer of RA (N0) and three families of oligomers, namely L*i* having both ends free, M*i* having only one end free, and N*i* having both ends terminated as the species shown in Scheme 1.

**Scheme 1S**

Now consider the following equilibrium:

(18S)

Since the symmetry number of L*i* is 2, the equilibrium constant relative to Equation (18S) is 2*K* ' (= 4 *K*), hence

[M*i*] = 4 *K* [A][L*i*] (19S)

Substituting Equation (1) into Equation (19S) and considering that  = 4, Equation (3) is obtained.

Now consider the following equilibrium:

(20S)

Since the symmetry number of N*i* is 2, the equilibrium constant relative to Equation (20S) is *K* '/ 2 (= *K*), hence

[N*i*] = *K* [A][M*i*] (21S)

Substituting Equation (3) into Equation (21S), Equation (4) is obtained.

**Equilibration of AA + RA with *K* Set Very High.** If the equilibrium constant *K* is assumed to be very high so that *K*[A]2 >> (*K*)-1 + [A], then [L*i*] = [M*i*] = 0 and [R*i*] = [N*i*]. In other words, Scheme 1S reduces to Scheme 2S.

**Scheme 2S**

The mass balance equation of L1 is now given by Equation (22S)

(22S)

Substituting Equation (4) into Equation (22S) and taking into account Equation (9S), Equation (22S) becomes

(23S)

The mass balance equation of A is given by Equation (24S)

(24S)

Substituting Equation (4) into Equation (24S) and considering that [N0] = *K*[A]2, Equation (24S) becomes

(25S)

Considering that *K*[A]2 >> [A] and substituting Equation (8S) into Equation (25S), Equation (26S) is easily obtained

(26S)

Substituting Equation (26S) into Equation (23S) and solving the resulting equation for *x*, Equation (27S) is obtained

(27S)

Considering that the total concentration of functional groups is given by [A]0 + 2[L1]0, and considering Equation (4), the fraction of N*i* weighted for the functional groups content, *w*(N*i*), is given by Equation (28S). Note that Equation (28S) holds also in the case *i* = 0.

(28S)

Substituting Equation (26S) into Equation (28S), and considering that [A]0/([A]0 + 2[L1]0) = (1 - *x*), Equation (28S) becomes

(29S)

Substituting Equation (27S) into Equation (29S), Equation (30S) is obtained

(30S)

Plots of *w*(N0), *w*(N1), and *w*(N2) against [A]0/[L1]0 are shown in Figure 2.

Equation (30S) shows a maximum in correspondence of [A]0/[L1]0 = 4/*i*.

**Self-assembly of the Square.** The *C*1/2 value reported by DSMN (0.8mM) for the formation of the square is not consistent with the reported equilibrium constant (*K*square = 2400 dm9 mol-3) probably because of computational errors. Here the *K*square value is estimated from *C*1/2, under the assumption that the square and the monomer are the only species present in solution.

Consider the equilibrium of oligomerization

(31S)

When the total concentration of A is *C*1/2, the concentration of unbound units is equal to the concentration of bound units, i. e. [A] = *i*[A*i*] = *C*1/2 /2, therefore the equilibrium constant is given by Equation (32S)

(32S)

Since for the formation of the square *i* = 4 and *C*1/2 = 0.8 mM, an equilibrium constant *K*square = 3.9109 dm9 mol-3 can be obtained.

Since *K*square = EM(*K*)4 ,  = 4, and *K* = 160 dm mol-1, the effective molarity of the square is EM = 2.310-2 mol dm-3. This value however has to be considered as approximate, because in a previous work it has been shown that the assumption that the square and the monomer are the only species present in solution, practically holds only if EM*K*  (0.12/*i*) 10*i* = 300 (see Equation 14 of ref. 5). Since this condition is not satisfied, this means that in solution there are also significant concentrations of linear oligomers heavier than the monomer. By assuming, however, that the obtained EM value is roughly correct (in fact it should be lower), the maximum yield of the square can be calculated by Equation (10) of ref. 5, that is reported here as Equation (33S)

(33S)

where . In the present case, *i =* 4, a value of 67 % can be calculated.
